# Supplementary material for: Performance of a Three-Tier (IRT-DNA-IRT) Cystic Fibrosis Screening Algorithm in British Columbia
Source: Int J Neonatal Screen. 2020 Jun 2;6(2):46. doi: 10.3390/ijns6020046 (PMC7423010; doi:10.3390/ijns6020046)
Supplement: Supplementary file 1 [file IJNS-06-00046-s001.xlsx]

## Sheet: Sheet1
BC Newborn Screening Program CFTR Variant Panel
9 Nov 2009 – 14 Jul	15 Jul 2010 – 30 Sept	1 Oct 2016 – Present (130 variants)
2010	2016
(24 variants)	(38 variants)
G85E	G85E	G85E
R117H	R117H	R117H
621+1G>T	621+1G>T	621+1G>T
711+1G>T	711+1G>T	711+1G>T
1078delT	1078delT	1078delT
R334W	R334W	R334W
R347P	R347P	R347P
A455E	A455E	A455E
I507del	I507del	I507del
F508del	F508del	F508del
1717-1G>A	1717-1G>A	1717-1G>A
G542X	G542X	G542X
G551D	G551D	G551D
R553X	R553X	R553X
R560T	R560T	R560T
1898+1G>A	1898+1G>A	1898+1G>A
2184delA	2184delA	2184delA
2789+5G>A	2789+5G>A	2789+5G>A
3120+1G>A	3120+1G>A	3120+1G>A
R1162X	R1162X	R1162X
3659delC	3659delC	3659delC
3849+10kbC>T	3849+10kbC>T	3849+10kbC>T
W1282X	W1282X	W1282X
N1303K	N1303K	N1303K
	Q493X	Q493X
	S549N	S549N
	3905insT	3905insT
	E60X	E60X
	Y1092X C>A	Y1092X C>A
	2183AA>G	2183AA>G
	V520F	V520F
	S549R	S549R
	R347H	R347H
	3876delA	3876delA
	394delTT	394delTT
	Y122X	Y122X
	D1152H	NOT IN PANEL
	3849+4A>G	NOT IN PANEL
		M1V
		CFTRdelee2,3
		Q39X
		P67L
		R75X
		405+1G>A
		406-1G>A
		E92X
		E92K
		Q98X
		457TAT>G
		D110H
		R117C
		663delT
		G178R
		711+3A>G
		711+5G>A
		712-1G>T
		H199Y
		P205S
		L206W
		Q220X
		852del22
		G330X
		I336K
		T338I
		S341P
		1154insTC
		R352Q
		1213delT
		1248+1G>A
		1259insA
		W401X
		1341+1G>A
		1461ins4
		1525-1G>A
		S466X
		L467P
		1548delG
		S489X
		S492F
		1677delTA
		Q525X
		1717-8G>A
		Q552X
		A559T
		R560K
		1181+1.6kbA>G
		1812-1G>A
		E585X
		1898+3A>G
		2143delT
		2184insA
		R709X
		K710X
		2307insA
		L732X
		2347delG
		R764X
		2585delT
		E822X
		2622+1G>A
		E831X
		W846X
		R851X
		2711delT
		Q890X
		L927P
		S945L
		3007delG
		G970R
		3120G>A
		3121-1G>A
		3272-26A>G
		L1065P
		R1066C
		R1066H
		L1077P
		W1089X
		M1101K
		E1104X
		R1158X
		S1196X
		W1204X
		3791delC
		G1244E
		S1251N
		4005+1G>A
		4016insT
		Q1313X
		4209TGTT>AA
		CFTRdele22,23
		4382delA
